# Supplementary material
Source: Springer Nature journal article supplement (https://www.springermedizin.de/resource/supplementary/12889_2010_2797_MOESM5_ESM.pdf/9489442)

Proportion of no chewing habit

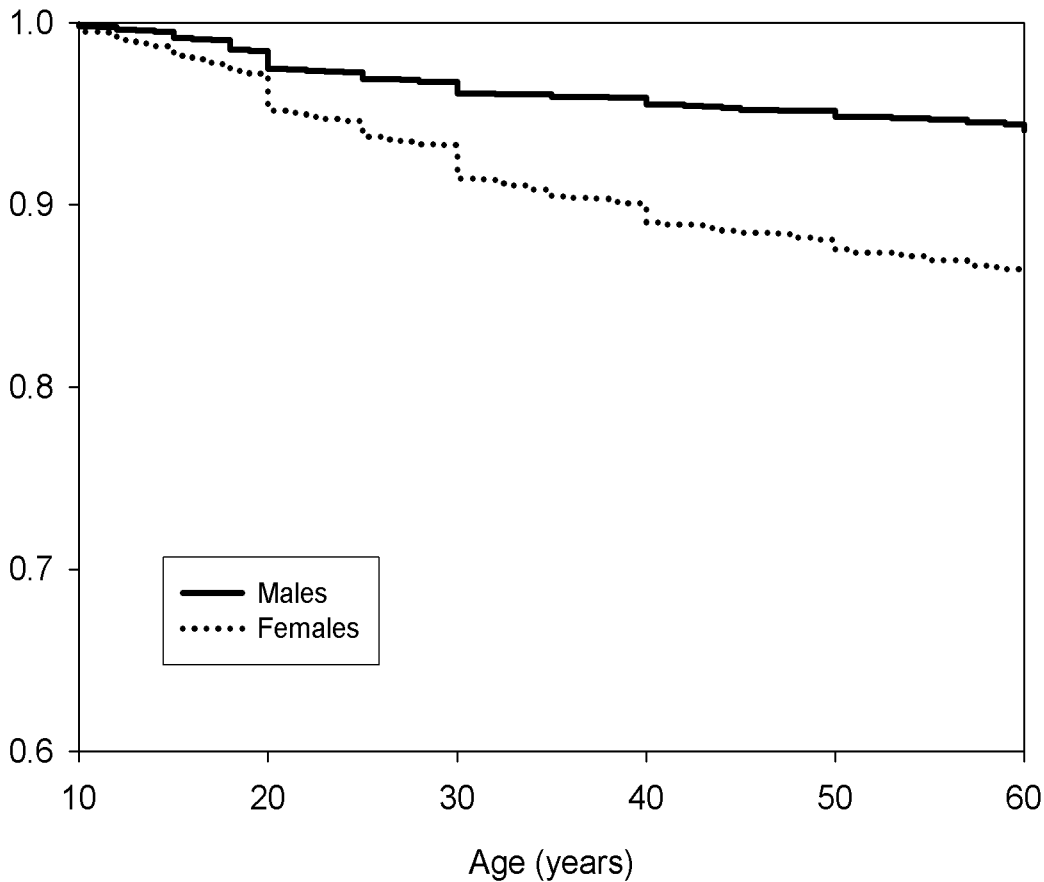

Supplement: MOESM5 [file 9489442]
